# Supplementary material for: Structural analysis of influenza vaccine virus-like particles reveals a multicomponent organization
Source: PubMed Central journal article supplement (PMC6037804; doi:10.1038/s41598-018-28700-7), 2018-07-09
Supplement: 41598_2018_28700_MOESM1_ESM.pdf [file 41598_2018_28700_MOESM1_ESM.pdf]

1 **SUPPLEMENTAL MATERIAL**

2 **Structural analysis of influenza vaccine virus-like particles reveals a multicomponent**  
3 **organization**

4  
5 **Dustin M. McCraw<sup>1</sup>, John R. Gallagher<sup>1</sup>, Udana Torian<sup>1</sup>, Mallory L. Myers<sup>1</sup>, Michael T. Conlon<sup>1</sup>,**  
6 **Neetu M. Gulati<sup>1</sup> and Audray K. Harris<sup>1#</sup>**

7  
8 **<sup>1</sup>Laboratory of Infectious Diseases, National Institute of Allergy and Infectious Diseases,**  
9 **National Institutes of Health, 50 South Drive, Room 6351, Bethesda, MD, USA 20892**

10

11

12 #To whom correspondence should be addressed; E-mail A.K. H. ([harrisau@mail.nih.gov](mailto:harrisau@mail.nih.gov))

13 [301-385-4061](tel:301-385-4061)

14

15

16 **Keywords: influenza virus, virus-like particles, cryo-electron microscopy, structure,**  
17 **tomography, vaccine, assembly**

18 **Classification: Biological Sciences, Biophysics and Computational Biology**

19

20

21

22

23

24

25

26

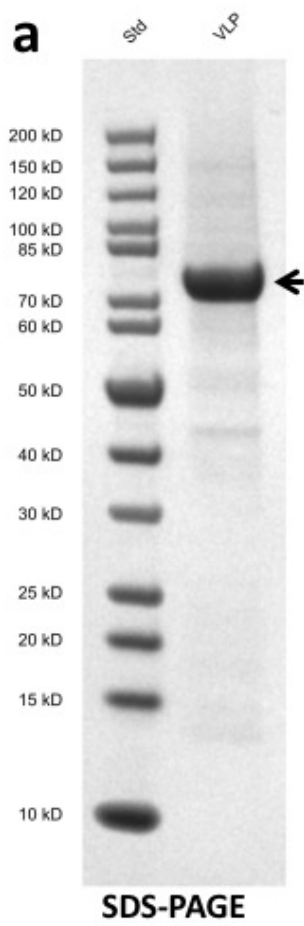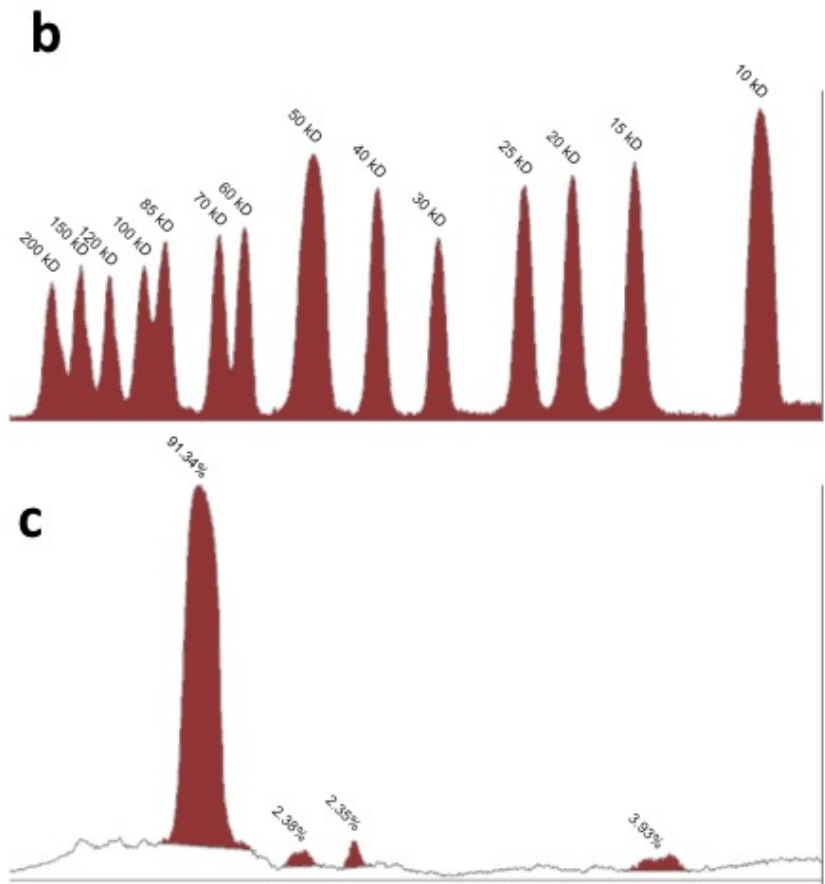

Figure S1

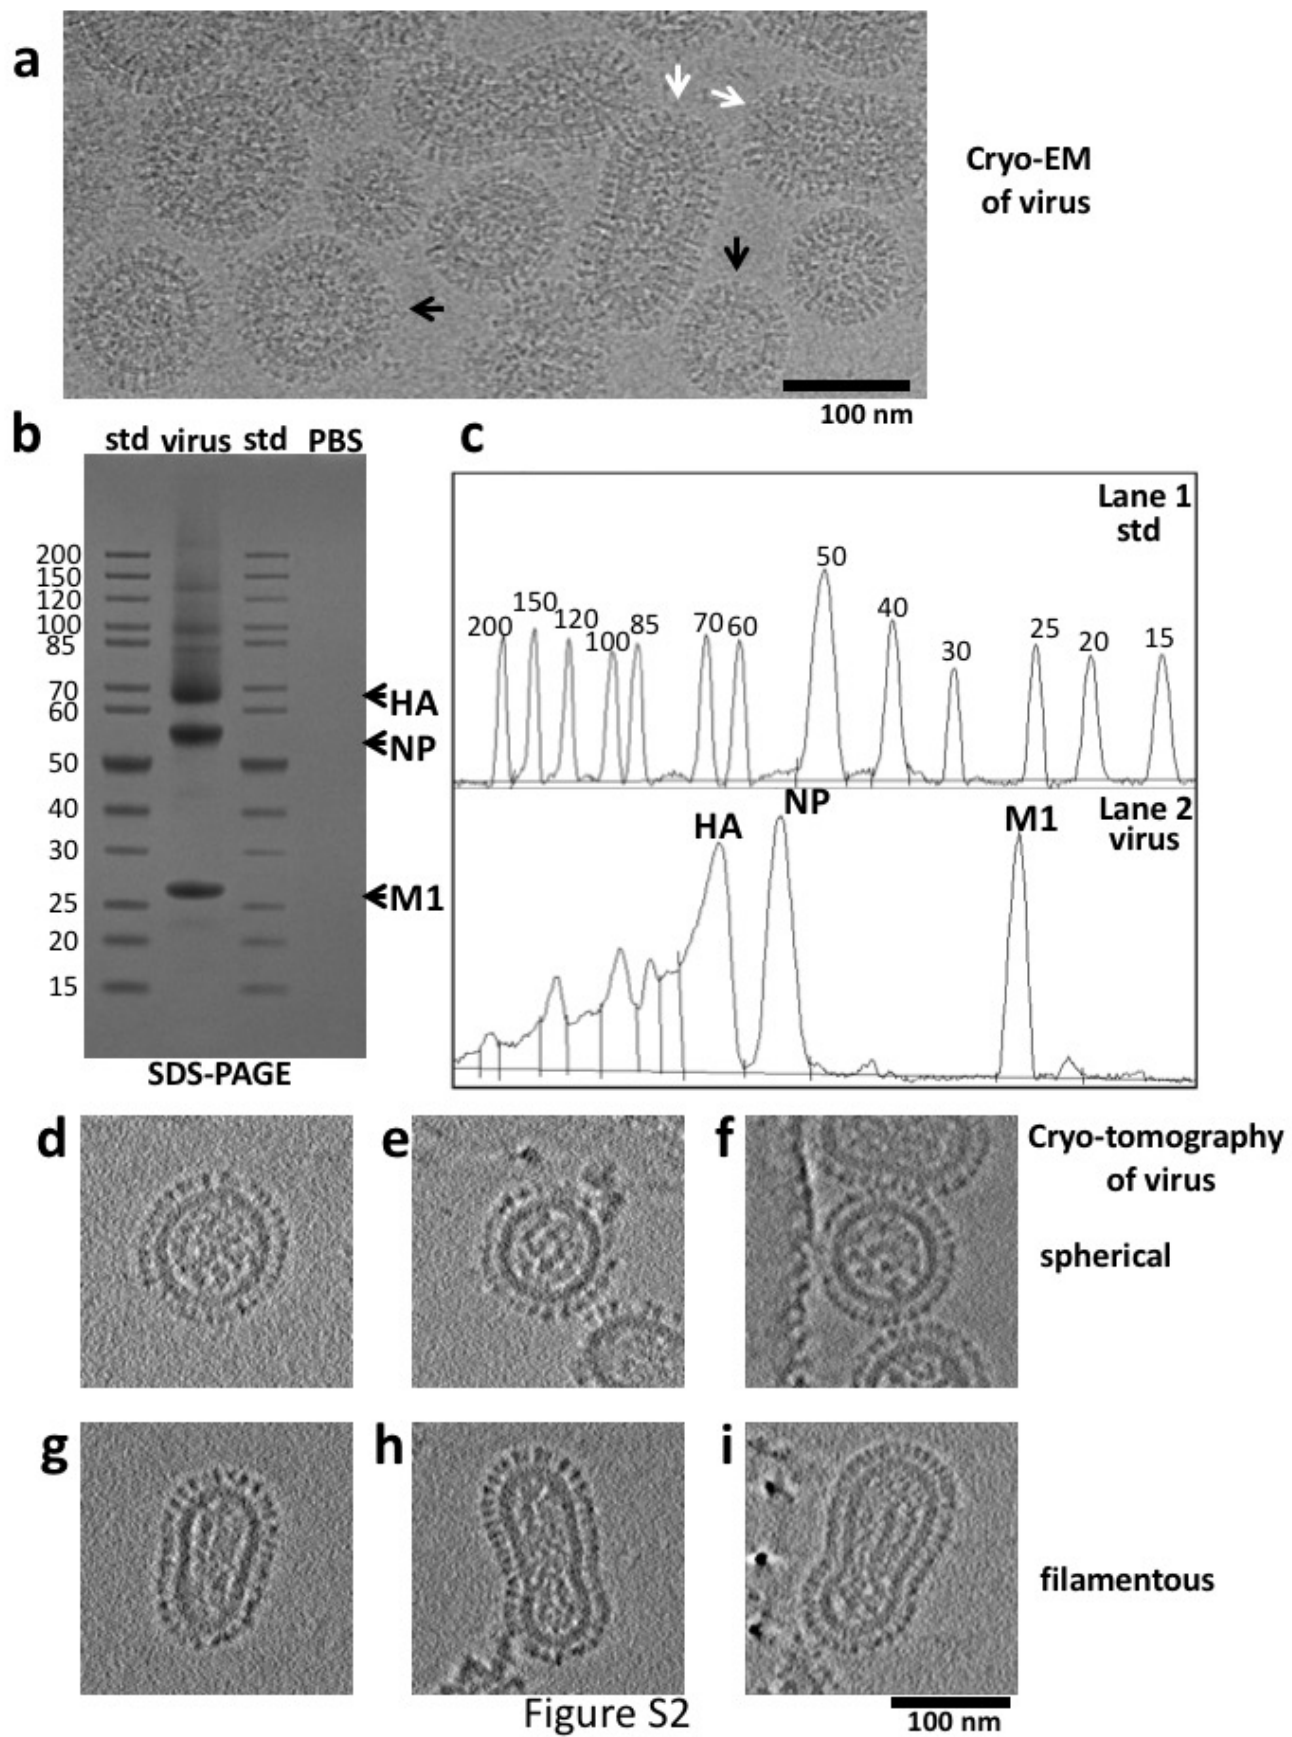

Table S1

| <b>TABLE S1. (Peptide Spectrum Matches) of 1918 HA H1 from VLPs</b> |                                                                                                                                        |        |       |          |          |  |
|---------------------------------------------------------------------|----------------------------------------------------------------------------------------------------------------------------------------|--------|-------|----------|----------|--|
| <b>INFLUENZA SERACH</b>                                             |                                                                                                                                        |        |       |          |          |  |
| Accession                                                           | Description                                                                                                                            | # PSMs | # AAs | MW [kDa] | calc. pi |  |
| P03455                                                              | Hemagglutinin OS=Influenza A virus (strain A/Swine/New Jersey/11/1976 H1N1) GN=HA PE=3 SV=1 - [HEMA_I76AI]                             | 57     | 566   | 63.3     | 7.56     |  |
| Q9WFX3                                                              | Hemagglutinin OS=Influenza A virus (strain A/Brevig Mission/1/1918 H1N1) GN=HA PE=1 SV=2 - [HEMA_I18A0]                                | 108    | 566   | 62.8     | 6.47     |  |
| Q82509                                                              | Hemagglutinin OS=Influenza A virus (strain A/Tern/South Africa/1961 H5N3) GN=HA PE=2 SV=1 - [HEMA_I61A0]                               | 1      | 568   | 64.2     | 6.23     |  |
| P87506                                                              | Hemagglutinin OS=Influenza A virus (strain A/Mallard/Ohio/556/1987 H5N9) GN=HA PE=2 SV=1 - [HEMA_I87A1]                                | 7      | 564   | 63.6     | 5.92     |  |
| Q6DPU2                                                              | Matrix protein 1 (Fragment) OS=Influenza A virus (strain A/Guinea fowl/Hong Kong/38/2002 H5N1 genotype X0) GN=M PE=3 SV=1 - [M1_I02A1] | 1      | 245   | 27.1     | 9.42     |  |
| <b>SF9 SEARCH</b>                                                   |                                                                                                                                        |        |       |          |          |  |
| Accession                                                           | Description                                                                                                                            | # PSMs | # AAs | MW [kDa] | calc. pi |  |
| I7FV58                                                              | Ubiquitin OS=Spodoptera frugiperda PE=2 SV=1 - [I7FV58_SPOFR]                                                                          | 1      | 76    | 8.6      | 7.25     |  |
| Q8WQJ5                                                              | 40S ribosomal protein S8 OS=Spodoptera frugiperda GN=RpS8 PE=2 SV=1 - [RS8_SPOFR]                                                      | 1      | 208   | 23.8     | 10.64    |  |
| C8CJY7                                                              | Triosephosphate isomerase (Fragment) OS=Spodoptera frugiperda GN=tpi PE=3 SV=1 - [C8CJY7_SPOFR]                                        | 1      | 105   | 11.4     | 5.22     |  |
| G3CKA6                                                              | Actin OS=Spodoptera frugiperda PE=1 SV=1 - [G3CKA6_SPOFR]                                                                              | 4      | 376   | 41.7     | 5.48     |  |
| Q95V36                                                              | Ribosomal protein S3 OS=Spodoptera frugiperda PE=2 SV=1 - [Q95V36_SPOFR]                                                               | 1      | 243   | 26.8     | 9.69     |  |
| G3CKA7                                                              | Alpha-tubulin OS=Spodoptera frugiperda PE=2 SV=1 - [G3CKA7_SPOFR]                                                                      | 1      | 450   | 49.9     | 5.19     |  |
| Q8ISR0                                                              | Beta-1 tubulin (Fragment) OS=Spodoptera frugiperda PE=2 SV=1 - [Q8ISR0_SPOFR]                                                          | 1      | 56    | 6.8      | 4.5      |  |
| A0A0K2CTM7                                                          | Heat shock protein 70 A1 (Fragment) OS=Spodoptera frugiperda PE=2 SV=1 - [A0A0K2CTM7_SPOFR]                                            | 4      | 178   | 19.5     | 8.07     |  |
| Q6B816                                                              | Histone H4 (Fragment) OS=Spodoptera frugiperda PE=4 SV=1 - [Q6B816_SPOFR]                                                              | 1      | 43    | 4.9      | 11.31    |  |
| Q8I866                                                              | Heat shock cognate 70 protein OS=Spodoptera frugiperda PE=2 SV=1 - [Q8I866_SPOFR]                                                      | 6      | 659   | 73.1     | 5.34     |  |
| Q9GQG6                                                              | 90-kDa heat shock protein HSP83 OS=Spodoptera frugiperda GN=hsp83 PE=2 SV=1 - [Q9GQG6_SPOFR]                                           | 1      | 717   | 82.5     | 5.07     |  |
| X4ZE67                                                              | Actin-related protein Arp2 (Fragment) OS=Spodoptera frugiperda GN=ARP2 PE=2 SV=1 - [X4ZE67_SPOFR]                                      | 1      | 394   | 44.9     | 6.16     |  |
| <b>BACULOVIRUS SEARCH</b>                                           |                                                                                                                                        |        |       |          |          |  |
| Accession                                                           | Description                                                                                                                            | # PSMs | # AAs | MW [kDa] | calc. pi |  |
| A0A097PV47                                                          | AcOrf-81 OS=Autographa californica nuclear polyhedrosis virus GN=AcOrf-81 PE=4 SV=1 - [A0A097PV47_NPVAC]                               | 1      | 220   | 25.5     | 9.03     |  |

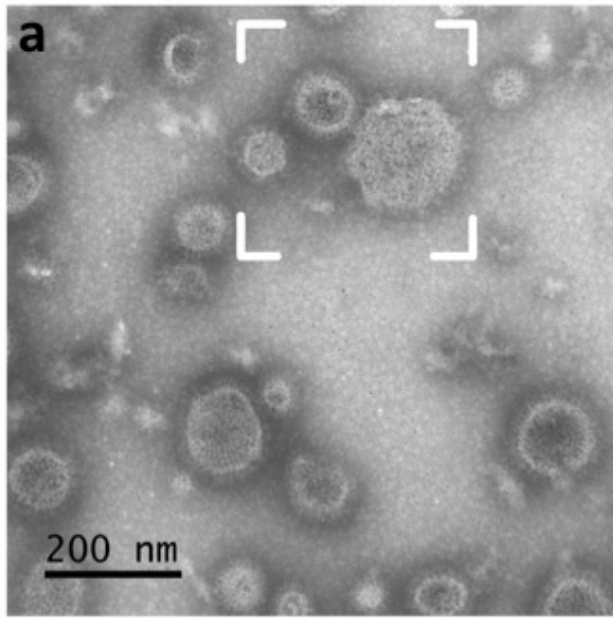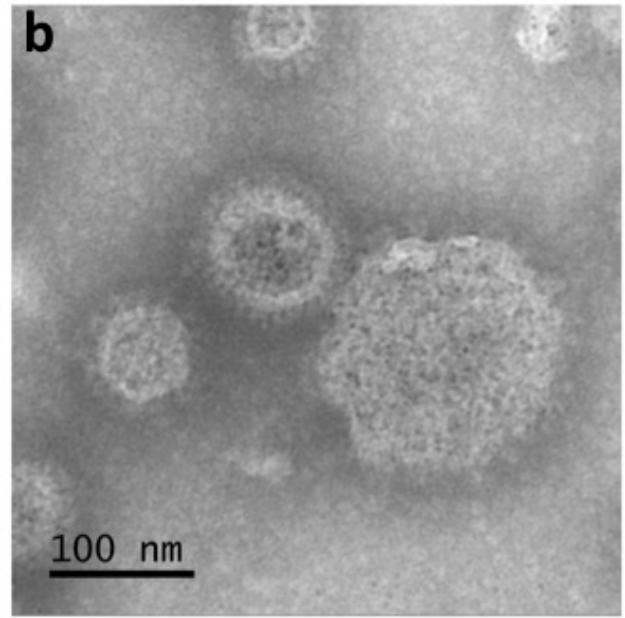

Figure S3

A/Victoria/3/1975 (H3N2) influenza virus

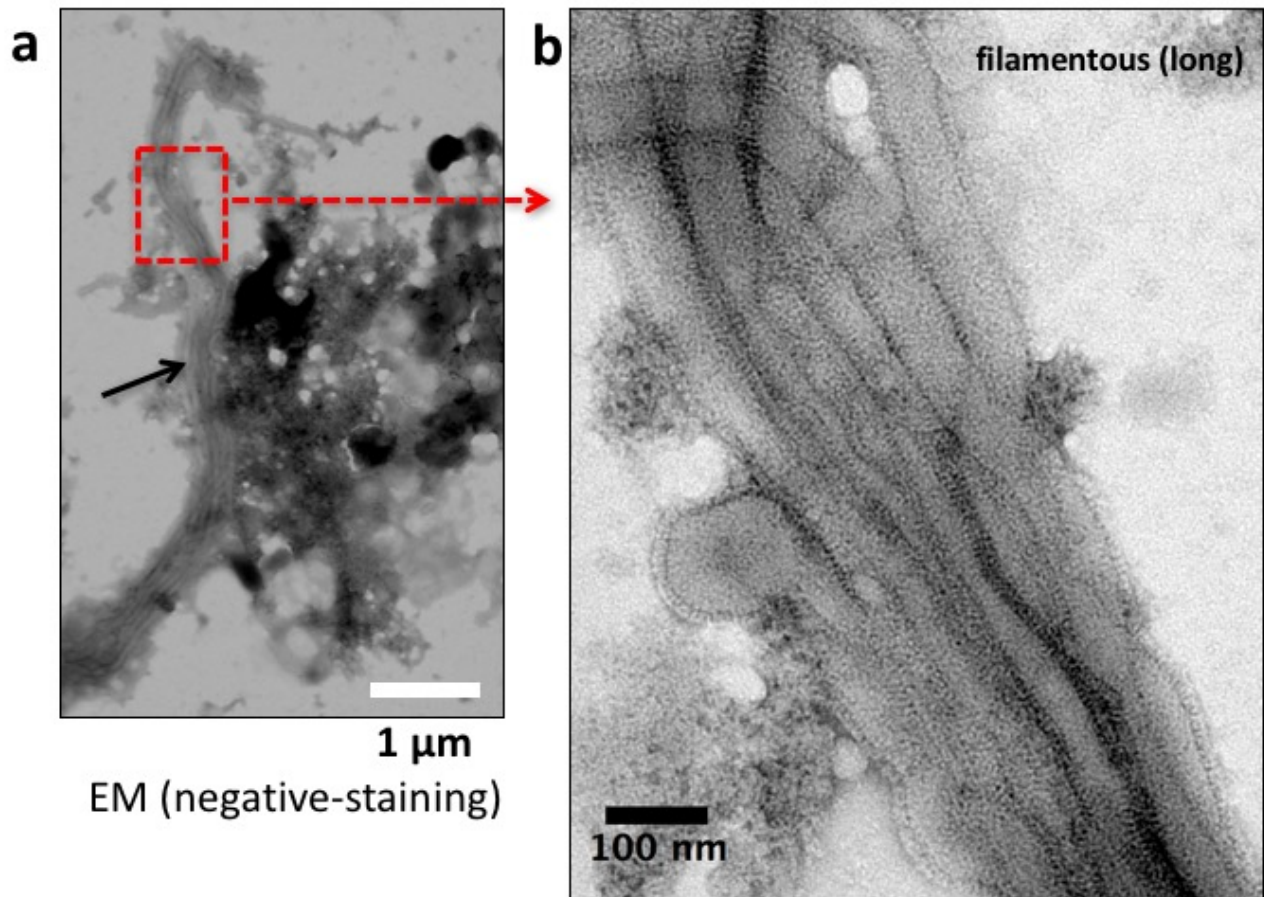

A/California/4/2009 (H1N1) pandemic influenza virus

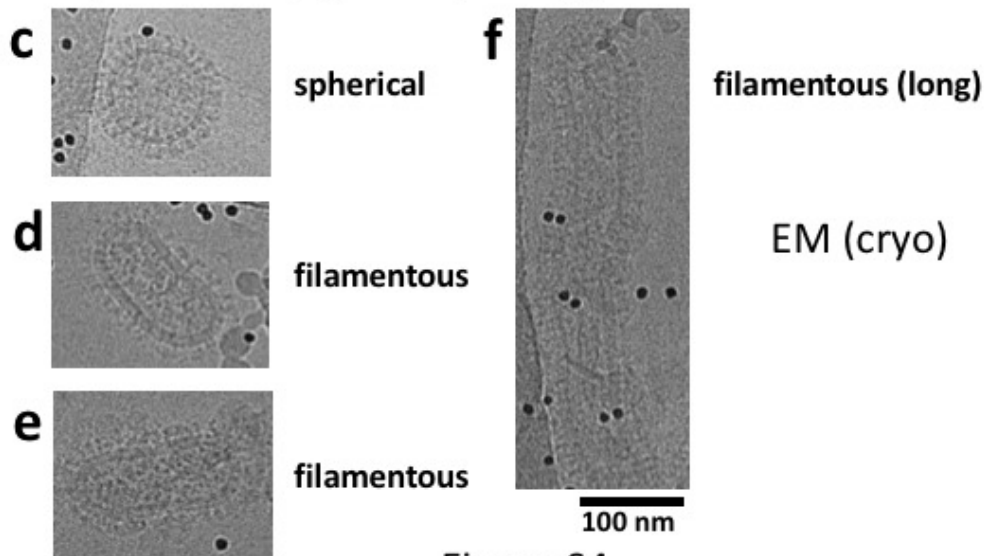

Figure S4

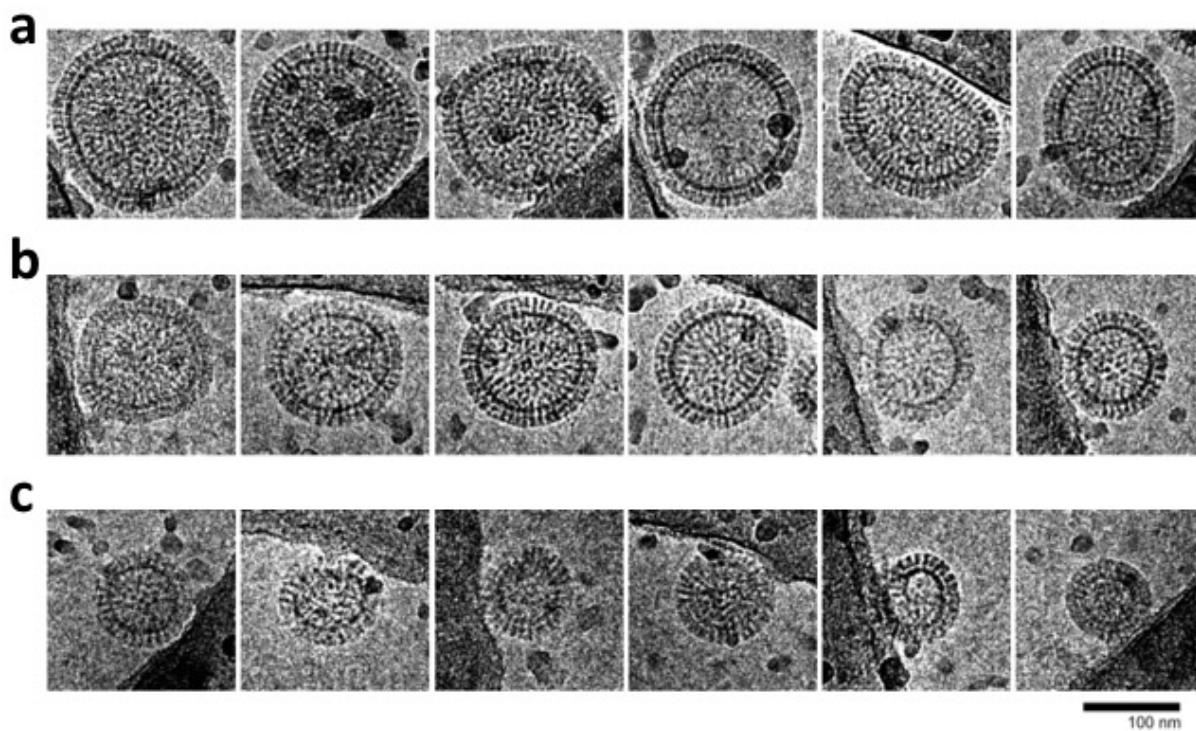

Figure S5

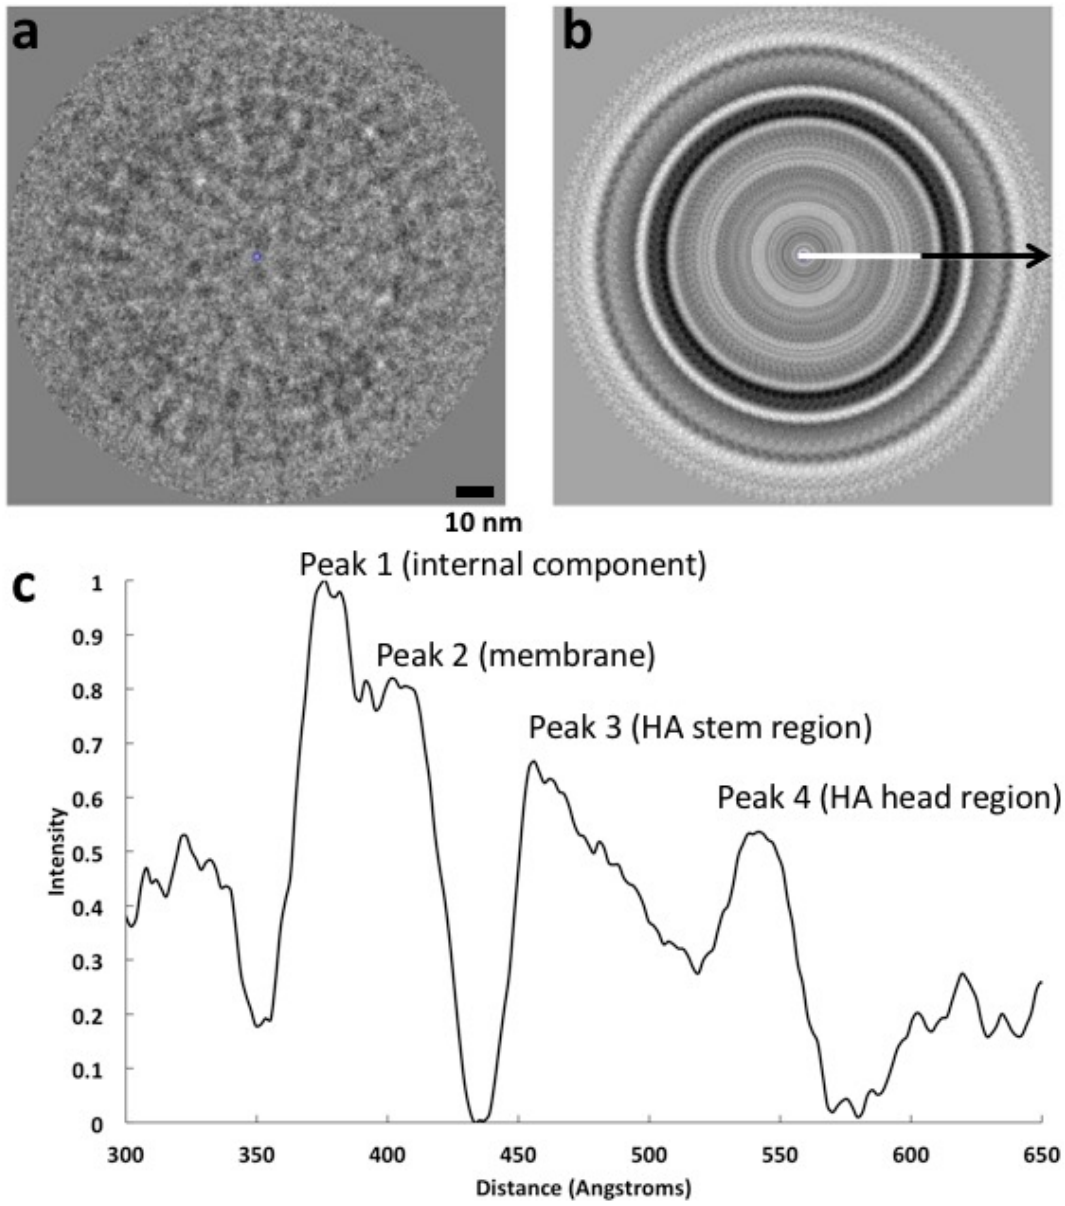

Figure S6



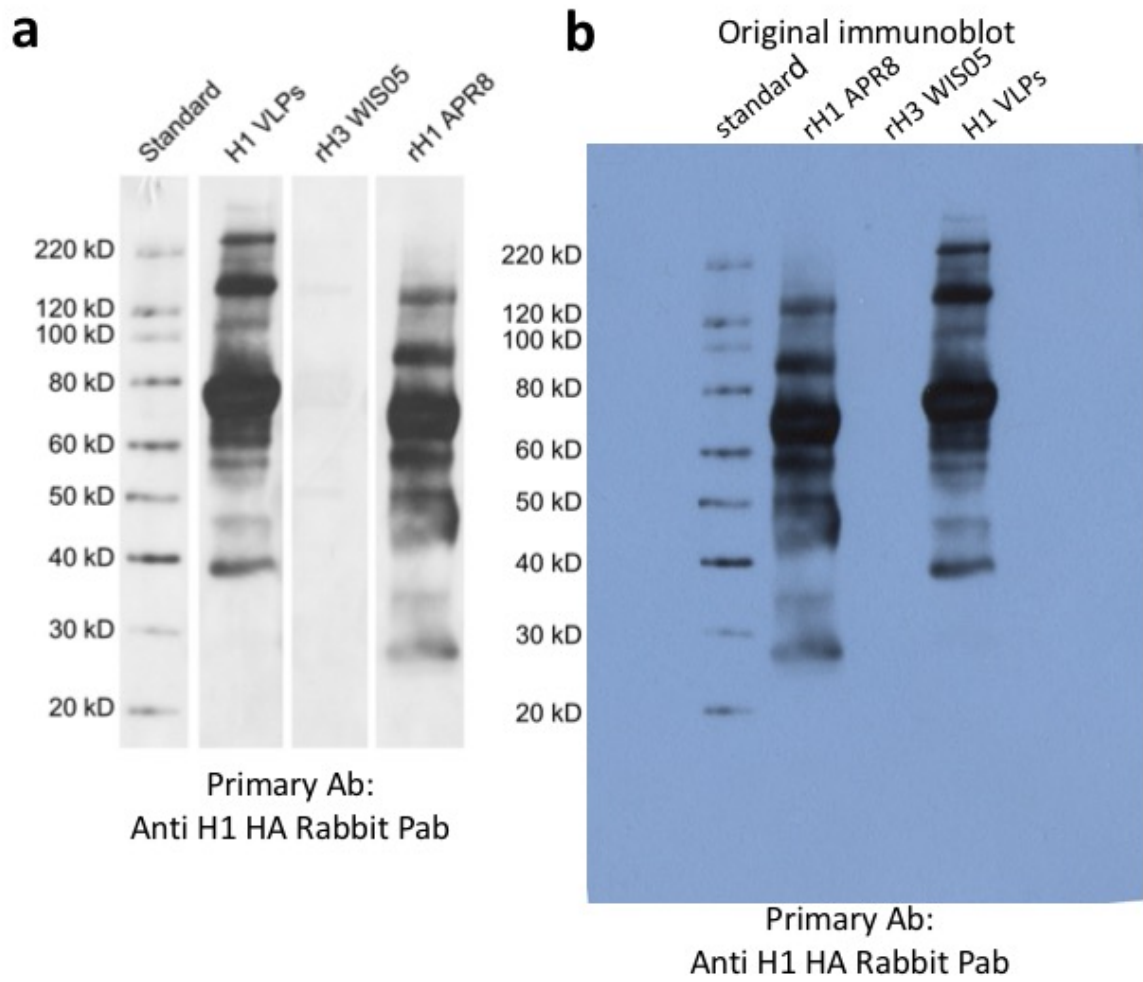

Figure S7

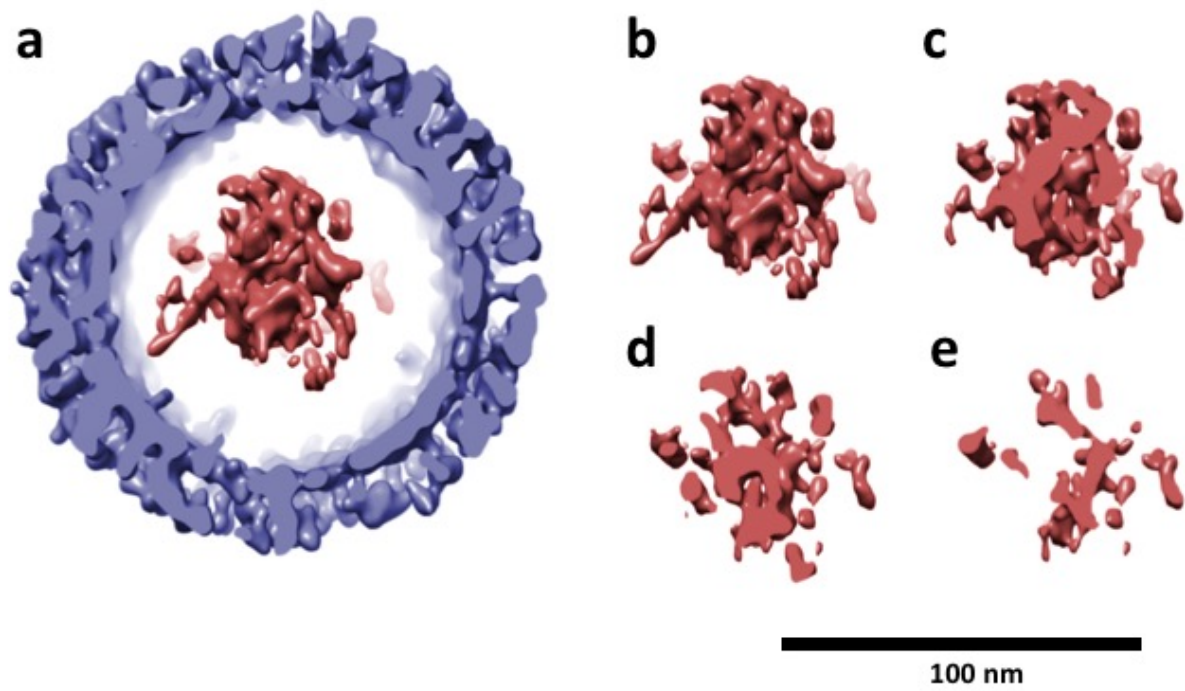

Figure S8

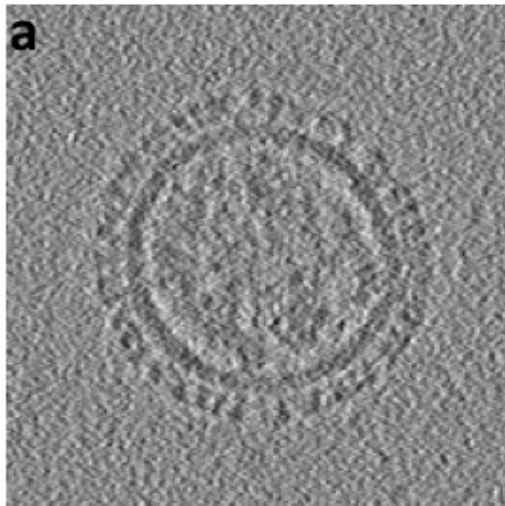

**Virus-like particle (VLP)**

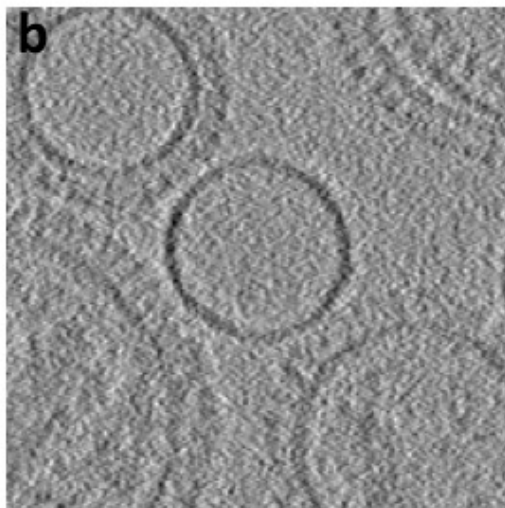

**Vesicle (surrounded by VLPs)**

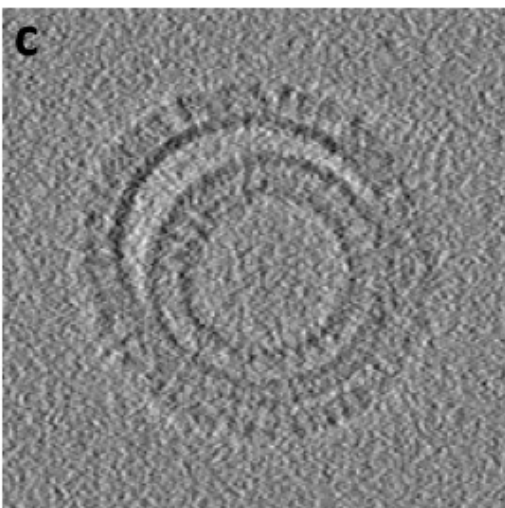

**VLP (with internal vesicle with smaller VLP inside)**

100 nm

**Figure S9**

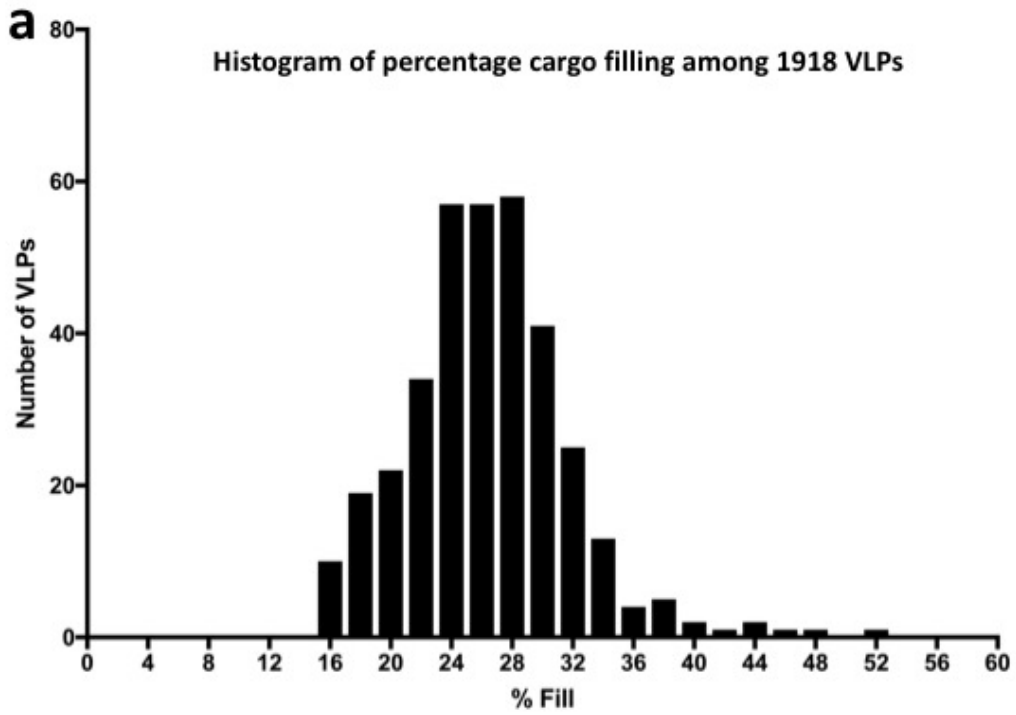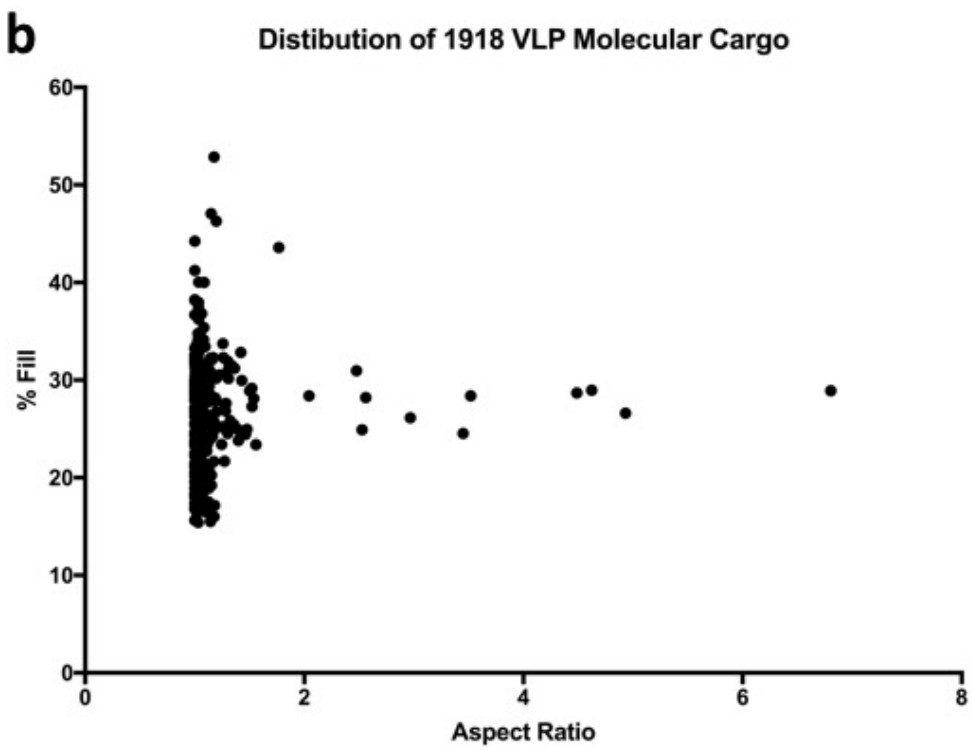

Figure S10

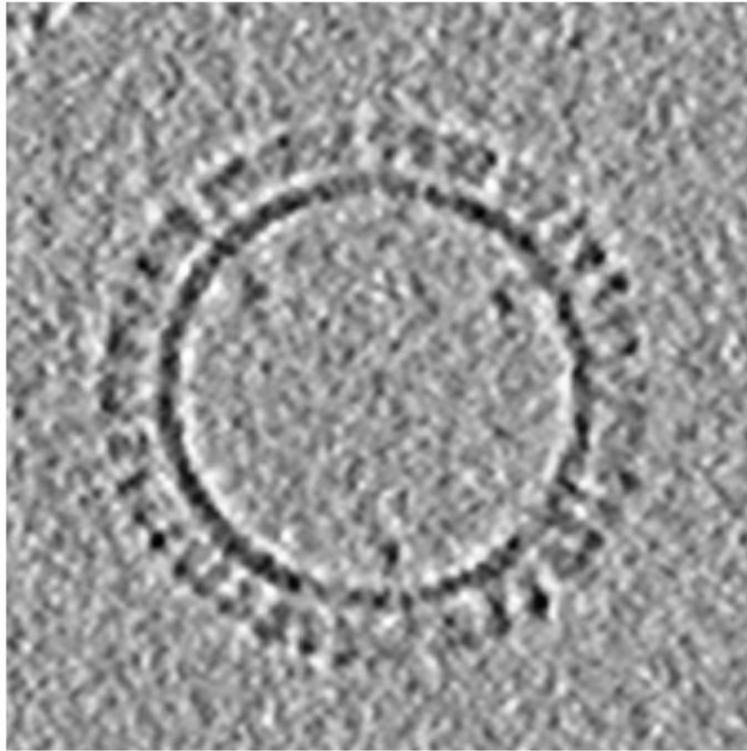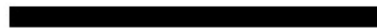

100 nm

Movie S1

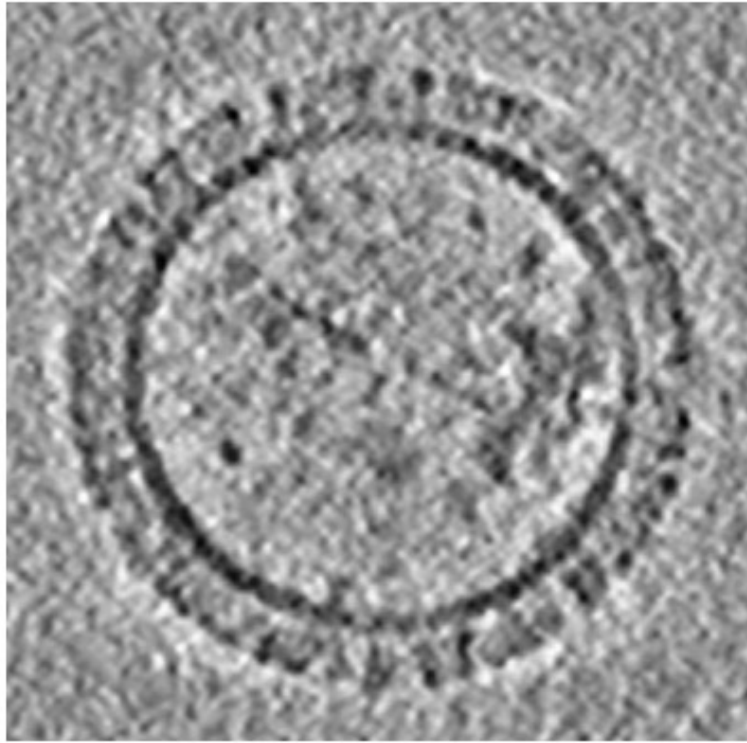

100 nm

Movie S2

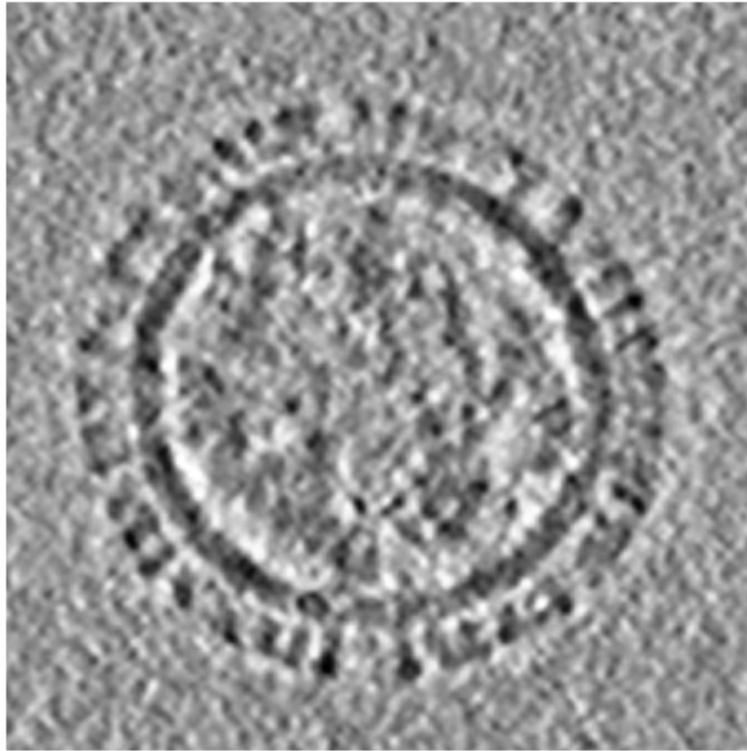

100 nm

Movie S3

41 **SUPPLEMENTAL FIGURE CAPTIONS**

42 **Figure S1.** Analysis of composition and purity of hemagglutinin in 1918 influenza virus-like  
43 particles (VLPs). (a) SDS-PAGE analysis of VLPs under reducing conditions. Samples are molecular  
44 weight standards (std) and VLPs. A major band at an apparent molecular weight of about 75  
45 kilodaltons is in the VLP sample. The major band is indicated by an arrow. (b) 1-D density profile of  
46 protein standards with molecular weights as labeled. (c) 1-D density profile of 1918 influenza VLP  
47 sample from SDS-PAGE in panel a. Areas under peaks are in red. Relative abundance was calculated  
48 as the area under the peak above the baseline as compared to other background areas. The relative  
49 abundance for each peak is as labeled. The hemagglutinin is the dominant component of VLPs  
50 (greater than 91%).

51 **Figure S2.** Analysis of structure and composition of H1N1 influenza virus (A/Puerto Rico/8/1934  
52 (H1N1)). (a) Image by cryo-electron microscopy of a field of virus particles with spherical and  
53 filamentous morphologies. Some spherical (black arrows) and filamentous virions (white arrows)  
54 are indicated. (b) SDS-PAGE analysis of virus with molecular weight standards (std) and PBS. Major  
55 bands of structural proteins are at apparent molecular weights of about 75 kDa (hemagglutinin,  
56 HA), 56 kDa (nucleoprotein, NP) and 27kDa (matrix, M1) in the virus sample. (c) (Top panel) 1-D  
57 profile of protein standard with molecular weights as labeled and (bottom panel) 1-D profile of  
58 influenza virus bands from SDS-PAGE. (d, e, f). Near central slices through 3D tomographic volumes  
59 of influenza virions with spherical morphologies. (g, h, i) Near central slices through 3D  
60 tomographic volumes of influenza virions with filamentous morphologies. Panels d to i are on the  
61 same scale. Scale bars, 100 nm.

62 **Figure S3.** Analysis of virus-like particles by negative-staining electron microscopy. (a) Electron  
63 microscopy images of 1918 VLPs negatively stained with 1.5% phosphotungstic acid at 52,000x  
64 magnification. (b) Higher magnification (110,000x) of the bracketed region in panel a. Spikes are  
65 observed on the surface. Image contrast is with protein as white. Scale bars, 200, 100 nm.



66 **Figure S4.** Filamentous morphologies of influenza viruses as observed by electron microscopy. (a)  
67 Negative-staining electron microscopy of a field of long filamentous influenza viruses  
68 (A/Victoria/3/1975 (H3N2) grown in MDCK cells. Scale bar, one micrometer. (b) Higher  
69 magnification of the region boxed in panel a. Several filamentous particles are close together and  
70 are hundreds of nanometers in length. Scale bar, 100 nm. (c, d, e, f) Cryo-electron microscopy of  
71 2009 pandemic influenza viruses (A/California/4/09 (H1N1)) grown in embryonated chicken eggs.  
72 (c) Virus with spherical morphology. (d, e) Viruses with filamentous morphologies. (f) Virus with  
73 long filamentous morphology. Panels c to f are on the same scale. Scale bar for panels c-f, 100 nm.

74 **Figure S5.** Montage of examples of individual virus-like particles (VLPs) as observed by cryo-  
75 electron microscopy. VLPs are arranged in order of largest to smallest. (a) Larger-, (b) medium-, (c)  
76 smaller-sized particles. Most VLPs possessed a spherical or near-spherical morphology, but the  
77 overall size of VLPs is variable. Image contrast is with protein as black. Panels are on the same  
78 scale. Scale bar, 100 nm.

79 **Figure S6.** Analysis of density distribution of a virus-like particle (VLP). (a) Image of a spherical  
80 VLP by cryo-electron microscopy. Scale bar, 10 nm. (b) 1D circular average of the VLP. An arrow  
81 denotes the direction of the profile trace with the arrow as white for the inside and with the arrow  
82 as black close to the membrane and glycoprotein region used in subsequent 1D profile analysis.  
83 Image contrast is black. (c) 1D density profile of the circular average from the black arrow region in  
84 panel b. The major peak regions are labeled with corresponding interpreted assignments to  
85 internal, membrane and hemagglutinin components.

86 **Figure S7.** Reactivity of 1918 H1 hemagglutinin (HA) virus-like particles with antibodies by  
87 immunoblot. Samples were probed for reactivity with an anti-H1 rabbit polyclonal as the primary  
88 antibody. (a) Immunoblot with lanes from original immunoblot (panel b) separated into separate  
89 panels for clarity. Samples were 1918 H1 HA VLPs, recombinant H3 HA (A/Wisconsin/67/05  
90 (H3N2) and recombinant H1 HA (A/PR/8 (H1N1)). Major bands at ~75kDa were detected for H1

91 VLPs and recombinant H1 HA protein (positive control) while recombinant H3 HA (negative  
92 control) was not reactive. The anti-H1 rabbit polyclonal antibody bound strongly to H1N1  
93 subtypes, but not to the H3N2 subtype. (b) Original immunoblot without lanes separated into  
94 individual panels.

95 **Figure S8.** Analysis of molecular regions of a virus-like particle (VLP) by segmentation of the  
96 tomographic volume. (a) Segmented model of a VLP. The membrane and hemagglutinin layers are  
97 colored in light blue and the internal component is colored in brick red. (b-e) The internal  
98 component is shown alone with slices through the volume by increasing z-clippings. Panels are on  
99 the same scale. Scale bar, 100 nm.

100 **Figure S9.** Comparison of virus-like particle (VLP) versus membrane vesicle by cryo-tomography.  
101 (a) Slice through a tomographic volume of a VLP. (b) Vesicle surrounded by neighboring VLPs. (c) A  
102 VLP with an apparent vesicle inside. The internal vesicle appears to have a smaller VLP on the  
103 inside. VLPs have spikes on the surfaces while vesicles appear smooth and spike-less. Vesicles were  
104 less than 1% of the particles observed. Panels are on the same scale. Scale bar, 100 nm.

105 **Figure S10.** Semi-automated analysis of influenza virus-like particles (VLP) tomograms in terms of  
106 relative amounts of internal density (% fill) and relationship to VLP aspect ratio. (a) Histogram of  
107 the relative amount of internal density filling each VLP. The distribution of the cargo has a peak at  
108 28%, with the average molecular cargo fill being  $26.4 \pm 5.4\%$ . (b) Plot of the aspect ratio of the  
109 VLPs against the % fill. VLPs were modeled as ellipses, and the aspect ratio was the length (nm) of  
110 major axis of the ellipse divided by length of minor axis. Automated analysis of VLP subtomograms  
111 computed the % fill of the molecular cargo for each of the 353 VLPs using a fixed density threshold.  
112 All VLPs had internal density (i.e. filled to some extent). While the morphology of the VLP was  
113 uncorrelated with the % fill, the amount of cargo was consistent with a random distribution  
114 centered about 26%.

115

116 **SUPPLEMENTAL MOVIE CAPTIONS**

117 **Movie S1.** Movie that slices through a cryo-electron microscopic 3D volume (tomogram) of a 1918  
118 H1 HA virus-like particle that is categorized with relative low amounts of internal components (i.e.  
119 molecular cargo). Scale bar, 100 nm.

120

121 **Movie S2.** Movie that slices through a cryo-electron microscopic 3D volume (tomogram) of a 1918  
122 H1 HA virus-like particle that is categorized with relative medium amounts of internal components  
123 (i.e. molecular cargo). Scale bar, 100 nm.

124

125 **Movie S3.** Movie that slices through a cryo-electron microscopic 3D volume (tomogram) of a 1918  
126 H1 HA virus-like particle that is categorized with relative high amounts of internal components (i.e.  
127 molecular cargo). Scale bar, 100 nm.

128 **SUPPLEMENTAL METHODS**

129 **Semi-automation of VLP tomogram analysis for internal density**

130 VLP tomograms were cropped to display a 10 nm central slab for each VLP using the Chimera  
131 package. Images were produced for each slab and the size and morphology of the VLPs was  
132 calculated as described for the size and morphology measurements. Ellipses containing the interior  
133 of the VLPs were analyzed using the Measure tool in Fiji. The % fill of molecular cargo for each slab  
134 was measured by thresholding the density at a fixed value, and then calculating the area containing  
135 cargo divided by the total area of the ellipse. In this case, internal VLP density computational  
136 classified as 'low' was less than 23% filled, medium between 23-29%, and high greater than 30%.  
137 Computational classification methods yielded 24% of VLPs classified as low, 42% as medium, and  
138 34% as high, which is similar to visual classification methods and with the majority of VLPs having  
139 internal densities like visual classification. Both analyses of VLPs indicated that the majority of the  
140 VLPs contained internal densities.
